# Supplementary material
Source: publisher figshare collection journal article supplement (https://gsajournals.figshare.com/ndownloader/files/28005645)
Supplement: Supplementary file 1 [file 28005645]

## Sheet: Sheet1
Table S1 Fly strains used
Name	Origin	Description	Genotype	Stock #	Reference
wAC9	Lab stock	Autosomes from BDSC #54590 and X chromosome from VDRC #60000. This is the background strain for a collection of nAChR CRISPR mutants.	w[1118]; +; +		T. Perry et al. 2021
25709 v-	BDSC	2nd chromosome attP landing site.	y[1] v[1] P{y[+t7.7]=nos-phiC31\int.NLS}X; P{y[+t7.7]=CaryP}attP40	25709	Bischof et al. 2007
pCFD4-D𝛽1	Lab stock	Transgenic sgRNA stock. sgRNAs targeting D𝛽1 5'UTR and D𝛽1 exon 5 are ubiquitously expressed (5'UTR_sgRNA and sgRNA2).	y[1] v[1] P{y[+t7.7]=nos-phiC31\int.NLS}X; P{pCFD4-D𝛽1}attP40		T. Perry et al. 2021
nanos-Cas9	BDSC	Cas9 driven during oogenesis by nanos regulatory sequences.	y[1] M{w[+mC]=nos-Cas9.P}ZH-2A w[*]	54591
actin-Cas9	BDSC	Cas9 driven by Actin5c promotor.	y[1] M{w[+mC]=Act5C-Cas9.P}ZH-2A w[*]	54590
UAS-Cas9	BDSC	3rd chromosome Cas9 under control of the UAS promotor.	w[1118]; P{y[+t7.7] w[+mC]=UAS-Cas9.C}attP2	54595
Dbal	Lab stock	2nd and 3rd chromosomes have balancers and marker chromosomes.	w[*]; If[*]/CyO; Sb/TM6b, Tb[1]		T. Perry et al. 2021
elav Dbal	Lab stock	2nd and 3rd chromosomes have balancers and marker chromosomes. elav-GAL4 X chromsome is from BDSC #458.	P{w[+mW.hs]=GawB}elav[C155]; If[*]/CyO; Sb/TM6b, Tb[1]
w;+; Sb/Hu	Lab stock	3rd chromosome has balancer and marker chromosome	w[*]; +; Sb/TM6b, Tb[1]
tub-GAL4/TM3.GFP	Lab stock	A fluorescent third chromosome balancer. All other chromosomes from BDSC #5138.	y[1] w[*]; +; P{w[+mC]=tubP-GAL4}LL7/TM3, P{w+mC=ActGFP}JMR2, Ser1
D𝛽1∆ex5	Lab stock	Contains a deletion in the D𝛽1 gene from the 5'UTR to exon 5. Maintained over fluorescent third chromosome balancer.	w[1118];+;D𝛽1∆ex5/TM3, P{w+mC=ActGFP}JMR2, Ser1		T. Perry et al. 2021
elav-GAL4	BDSC	Pan-neuronal GAL4 expression.	P{w[+mW.hs]=GawB}elav[C155]	458
CCAP-GAL4	BDSC	GAL4 expression in the CCAP-neurons.	y[1] w[*]; Bl[1]/CyO, y[+]; P{w[+mC]=CCAP-GAL4.P}9	25686
burs-GAL4	BDSC	GAL4 expression in the bursicon-positive CCAP-neurons.	w[*]; P{w[+mC]=Burs-GAL4.P}P12	40972
Armenia-14	Lab stock	Wild type strain.	.+;+;+		Perry et al. 2008
UAS-GFP.nls	BDSC	Reporter strain. Nuclear-localised GFP under control of the UAS promotor.	w[1118]; P{w[+mC]=UAS-GFP.nls}14	4775
